# Supplementary material
Source: PubMed Central journal article supplement (PMC4876602)
Supplement: NIHMS782564-supplement-Fc-fusion_proteins_and_FcRn_Supp.pdf [file NIHMS782564-supplement-Fc-fusion_proteins_and_FcRn_Supp.pdf]

Supplementary Table 1: Characteristics of Fc fusion proteins

| Drug                  | Fusion protein                                                                                                                                                                                                                             | Mechanism of action                                                                                                                                             | Indication                                                                                                                                                    | Molecular Weight (kDa)             | Expression System                                            | Post-translational modification | Pharmacokinetic parameters                                                                                                                                                                                                                                                                                                                                                                                                                                                                                                                                                                                                                                                                                                                         |
|-----------------------|--------------------------------------------------------------------------------------------------------------------------------------------------------------------------------------------------------------------------------------------|-----------------------------------------------------------------------------------------------------------------------------------------------------------------|---------------------------------------------------------------------------------------------------------------------------------------------------------------|------------------------------------|--------------------------------------------------------------|---------------------------------|----------------------------------------------------------------------------------------------------------------------------------------------------------------------------------------------------------------------------------------------------------------------------------------------------------------------------------------------------------------------------------------------------------------------------------------------------------------------------------------------------------------------------------------------------------------------------------------------------------------------------------------------------------------------------------------------------------------------------------------------------|
| <b>Approved drugs</b> |                                                                                                                                                                                                                                            |                                                                                                                                                                 |                                                                                                                                                               |                                    |                                                              |                                 |                                                                                                                                                                                                                                                                                                                                                                                                                                                                                                                                                                                                                                                                                                                                                    |
| <b>Etanercept</b>     | Dimeric fusion protein comprising the extracellular domain of human p75 TNF receptor fused to Fc (hinge, C <sub>H</sub> 2, and C <sub>H</sub> 3 domains) of human IgG1 (Enbrel <sup>®</sup> , 2011, Goldenberg, 1999, Mohler et al., 1993) | Inhibits binding of TNF $\alpha$ and TNF $\beta$ to cell surface TNF receptors (Enbrel <sup>®</sup> , 2011)                                                     | Rheumatoid arthritis, polyarticular juvenile idiopathic arthritis, psoriatic arthritis, ankylosing spondylitis, plaque psoriasis (Enbrel <sup>®</sup> , 2011) | 150 (Enbrel <sup>®</sup> , 2011)   | CHO cells (Enbrel <sup>®</sup> , 2011, Mohler et al., 1993)  | Glycosylation (Walsh, 2010)     | <ul style="list-style-type: none"> <li>• Mode of administration = SC injection (Enbrel<sup>®</sup>, 2011)</li> <li>• Mean <math>\pm</math> SD t<sub>1/2</sub>* = 4.24 <math>\pm</math> 1.25 days (Enbrel<sup>®</sup>, 2011)</li> <li>• Mean <math>\pm</math> SD CL* = 160 <math>\pm</math> 80 mL/h (Enbrel<sup>®</sup>, 2011)</li> <li>• Vd** = 18.5 L; extravascular distribution expected to be very small (Zhou, 2005)</li> <li>• Mean absolute bioavailability* = 58% (Zhou, 2005)</li> <li>• Metabolism and elimination*: Following binding of etanercept to TNF, the complex is thought to be metabolized via peptide and amino acid pathways, with either recycling of amino acids or elimination in bile and urine (Zhou, 2005)</li> </ul> |
| <b>Alefacept</b>      | Extracellular CD2-binding portion of human LFA-3 fused to Fc (hinge, C <sub>H</sub> 2 and C <sub>H</sub> 3 domains) of human IgG1 (AMEVIVE <sup>®</sup> , 2011, Miller et al., 1993, Majeau et al., 1994)                                  | Inhibits T lymphocyte activation by binding to the lymphocyte antigen, CD2, and preventing it binding to the LFA-3 ligand on APCs (AMEVIVE <sup>®</sup> , 2011) | Adult moderate to severe chronic plaque psoriasis (AMEVIVE <sup>®</sup> , 2011)                                                                               | 91.4 (AMEVIVE <sup>®</sup> , 2011) | CHO cells (AMEVIVE <sup>®</sup> , 2011, Miller et al., 1993) | Glycosylation (Walsh, 2010)     | <ul style="list-style-type: none"> <li>• Mode of administration = IM injection (AMEVIVE<sup>®</sup>, 2011)</li> <li>• Mean t<sub>1/2</sub>* = 11 days (AMEVIVE<sup>®</sup>, 2011)</li> <li>• Mean Vd* = 94 mL/kg (AMEVIVE<sup>®</sup>, 2011)</li> <li>• Mean CL* = 0.25 mL/h/kg (AMEVIVE<sup>®</sup>, 2011)</li> <li>• Bioavailability* = 63% (AMEVIVE<sup>®</sup>, 2011)</li> </ul>                                                                                                                                                                                                                                                                                                                                                               |
| <b>Abatacept</b>      | Extracellular domain of CTLA-4 fused to modified Fc (hinge, C <sub>H</sub> 2, and C <sub>H</sub> 3 domains) portion of human Ig G1 (Orencia, 2011)                                                                                         | Binds CD80 and CD86, blocking their interaction with CD28 and, therefore, inhibiting T cell activation (Orencia, 2011)                                          | Adult rheumatoid arthritis, juvenile idiopathic arthritis (Orencia, 2011)                                                                                     | 92 (Orencia, 2011)                 | Mammalian cell expression system (Orencia, 2011)             | Glycosylation (Walsh, 2010)     | <ul style="list-style-type: none"> <li>• Mode of administration = IV loading dose followed by SC injections (Orencia, 2011)</li> <li>• Mean (range) t<sub>1/2</sub> following IV administration** = 13.1 (8-25) days (Orencia, 2011)</li> <li>• Mean (range) CL following IV</li> </ul>                                                                                                                                                                                                                                                                                                                                                                                                                                                            |

| Drug               | Fusion protein                                                                                                                                                                                                   | Mechanism of action                                                                                                                                                                                                                           | Indication                                                                                                                                                             | Molecular Weight (kDa) | Expression System                                                                       | Post-translational modification | Pharmacokinetic parameters                                                                                                                                                                                                                                                                                                                              |
|--------------------|------------------------------------------------------------------------------------------------------------------------------------------------------------------------------------------------------------------|-----------------------------------------------------------------------------------------------------------------------------------------------------------------------------------------------------------------------------------------------|------------------------------------------------------------------------------------------------------------------------------------------------------------------------|------------------------|-----------------------------------------------------------------------------------------|---------------------------------|---------------------------------------------------------------------------------------------------------------------------------------------------------------------------------------------------------------------------------------------------------------------------------------------------------------------------------------------------------|
|                    |                                                                                                                                                                                                                  |                                                                                                                                                                                                                                               |                                                                                                                                                                        |                        |                                                                                         |                                 | <p>administration ** = 0.22 (0.13-0.47) mL/h/kg (Orencia, 2011)</p> <ul style="list-style-type: none"> <li>• Mean (range) Vd at steady state following IV administration ** = 70 (20-130) mL/kg (Orencia, 2011)</li> <li>• Bioavailability following SC administration = 78.6% (Orencia, 2011)</li> </ul>                                               |
| <b>Rilonacept</b>  | Dimeric fusion protein consisting of ligand-binding domains of the extracellular portions of the human IL-1 receptor component (IL-1RI) and IL-1RacP linked in-line to Fc portion of human IgG1 (Arcalyst, 2010) | Acts as a soluble decoy receptor by binding IL-1 $\beta$ and inhibiting its signalling (Arcalyst, 2010). Also binds IL-1 $\alpha$ and IL-1ra with reduced affinity (Arcalyst, 2010)                                                           | Cryopyrin-associated periodic syndromes, including familial cold autoinflammatory syndrome and Muckle-Wells syndrome in adults and children >12 years (Arcalyst, 2010) | 251 (Arcalyst, 2010)   | CHO cells (Arcalyst, 2010)                                                              | Glycosylation (Walsh, 2010)     | <ul style="list-style-type: none"> <li>• Mode of administration = SC injection (Arcalyst, 2010)</li> <li>• t<sub>1/2</sub> = 6.3 days in pediatrics and 7.0 days in adults (Gillespie et al., 2010)</li> <li>• Bioavailability* = 50% (Rilonacept_SmPC, 2009)</li> <li>• CL*** = 0.808 L/day (Rilonacept_SmPC, 2009)</li> </ul>                         |
| <b>Belatacept</b>  | Modified CTLA-4 (at sites L104E and A29) fused to Fc domain of human IgG1 (Larsen et al., 2005, NULOJIX, 2011)                                                                                                   | Blocks CD28-mediated costimulation of T cells by binding CD80 and CD86 on APCs (NULOJIX, 2011). <i>In vitro</i> , belatacept inhibits T cell proliferation and the production of IL-2, IFN- $\gamma$ , IL-4 and TNF- $\alpha$ (NULOJIX, 2011) | Kidney transplant rejection (NULOJIX, 2011)                                                                                                                            | 90 (NULOJIX, 2011)     | Mammalian cell expression system (NULOJIX, 2011)<br><br>COS cells (Larsen et al., 2005) | N/A                             | <ul style="list-style-type: none"> <li>• Mode of administration = IV injection (NULOJIX, 2011)</li> <li>• Mean (range) t<sub>1/2</sub>** = 9.8 (6.1-15.1) days (NULOJIX, 2011)</li> <li>• Mean (range) CL** = 0.49 (0.23-0.70) mL/h/kg (NULOJIX, 2011)</li> <li>• Mean (range) Vd at steady state** = 0.11 (0.067-0.17) L/kg (NULOJIX, 2011)</li> </ul> |
| <b>Aflibercept</b> | Second Ig domain of human VEGFR1 and third Ig domain of human VEGFR2 fused to Fc domain of human IgG1 (Eylea, 2011, Holash et al., 2002)                                                                         | Inhibits angiogenesis by acting as a decoy receptor that binds VEGF-A, VEGF-B, PlGF, blocking their interaction with VEGFRs (Eylea, 2011, Papadopoulos et al., 2012)                                                                          | Neovascular (wet) age-related macular degeneration (Eylea, 2011), in combination with FOLFIRI approved for metastatic colorectal cancer (Ciombor et al.,               | 97 (Eylea, 2011)       | CHO cells (Eylea, 2011, Holash et al., 2002)                                            | Glycosylation (Eylea, 2011)     | <ul style="list-style-type: none"> <li>• Mode of administration = ophthalmic intravitreal injection (Eylea, 2011) and IV injection</li> <li>• t<sub>1/2</sub> following IV injection = 5-6 days (Eylea, 2011)</li> <li>• Vd following IV injection = 6L (Eylea, 2011)</li> <li>• Elimination: expected to be eliminated through target-</li> </ul>      |

| Drug                        | Fusion protein                                                                                                                                       | Mechanism of action                                                                                                                               | Indication                                                                                      | Molecular Weight (kDa)                             | Expression System                    | Post-translational modification                                                                | Pharmacokinetic parameters                                                                                                                                                                                                                                                                                                                                                                                                                                                                                                                                                          |
|-----------------------------|------------------------------------------------------------------------------------------------------------------------------------------------------|---------------------------------------------------------------------------------------------------------------------------------------------------|-------------------------------------------------------------------------------------------------|----------------------------------------------------|--------------------------------------|------------------------------------------------------------------------------------------------|-------------------------------------------------------------------------------------------------------------------------------------------------------------------------------------------------------------------------------------------------------------------------------------------------------------------------------------------------------------------------------------------------------------------------------------------------------------------------------------------------------------------------------------------------------------------------------------|
|                             |                                                                                                                                                      |                                                                                                                                                   | 2013)                                                                                           |                                                    |                                      |                                                                                                | mediated disposition via binding to free endogenous VEGF, and metabolism via proteolysis (Eylea, 2011)                                                                                                                                                                                                                                                                                                                                                                                                                                                                              |
| <b>Romiplostim</b>          | Two tandem dimers of thrombopoietin mimetic peptides fused to Fc domain of human IgG1 (Molineux and Newland, 2010)                                   | Stimulates platelet production through binding to the thrombopoietin receptor (Mpl) (Molineux and Newland, 2010, Nplate, 2011, Wang et al., 2004) | Thrombocytopenia in patients with chronic immune thrombocytopenia (Nplate, 2011)                | 60 (Molineux and Newland, 2010, Wang et al., 2004) | E. coli (Molineux and Newland, 2010) | N/A                                                                                            | <ul style="list-style-type: none"> <li>• Mode of administration = SC injection (Nplate, 2011)</li> <li>• Median (range) <math>t_{1/2}</math> following SC injections** = 3.5 (1-34) days (Nplate, 2011)</li> <li>• Mean (SD) <math>t_{1/2}</math> following IV injection* = 13.8 (3.9) hours (Wang et al., 2004)</li> <li>• Mean (SD) CL* = 6.69 (1.03) mL/kg/h (Wang et al., 2004)</li> <li>• Mean (SD) central Vd* = 48.2 (7.4) mL/kg (Wang et al., 2004)</li> </ul>                                                                                                              |
| <b>Drugs in Development</b> |                                                                                                                                                      |                                                                                                                                                   |                                                                                                 |                                                    |                                      |                                                                                                |                                                                                                                                                                                                                                                                                                                                                                                                                                                                                                                                                                                     |
| <b>rFVIII-Fc</b>            | Monomeric fusion protein: single rFVIII molecule covalently fused to human IgG1 Fc domain, with no intervening linker sequence (Dumont et al., 2012) | Replacement clotting factor (Dumont et al., 2012, Peters et al., 2013)                                                                            | In phase 3 development for treatment of hemophilia A (Biogen_Idec, 2012, Mahlangu et al., 2013) | N/A                                                | HEK293 cells (Powell et al., 2012)   | N/A                                                                                            | <ul style="list-style-type: none"> <li>• Mode of administration = IV (Powell et al., 2012)</li> <li>• Mean (95% CI) <math>t_{1/2}</math>* = 18.8 h (14.8, 23.8) for 25 IU/kg dose, and 18.8 h (14.3, 24.5) for 65 IU/kg dose (Powell et al., 2012)</li> <li>• Mean (95% CI) CL* = 1.68 [1.31, 2.15] mL/hour/kg for 25 IU/kg dose, and 2.32 (1.64, 3.29) mL/hour/kg for 65 IU/kg dose (Powell et al., 2012)</li> <li>• Mean (95% CI) Vd at steady state* = 45.4 (39.3, 52.5) mL/kg for 25 IU/kg dose, and 62.8 (55.2, 71.5) mL/kg for 65 IU/kg dose (Powell et al., 2012)</li> </ul> |
| <b>rFIX-Fc</b>              | Monomeric fusion protein: single rFIX molecule covalently fused to human IgG1 Fc domain, no intervening linker sequence (Peters et al., 2010)        | Replacement clotting factor (Peters et al., 2010)                                                                                                 | In phase 3 development for treatment of hemophilia B (Biogen_Idec, 2012, Powell et al., 2013)   | 120 (Peters et al., 2010)                          | HEK293 cells (Shapiro et al., 2012)  | Propeptide processing, $\gamma$ -carboxylation, Ser 158 phosphorylation, Tyr 155 sulfation, N- | <ul style="list-style-type: none"> <li>• Mode of administration = IV injection (Shapiro et al., 2012)</li> <li>• Mean (range) <math>t_{1/2}</math>* = 56.7 (42.4-74.5) h (Shapiro et al., 2012)</li> <li>• Mean (range) CL* = 3.18 (2.05-4.18) mL/hour/kg (Shapiro et al., 2012)</li> </ul>                                                                                                                                                                                                                                                                                         |

| Drug             | Fusion protein                                                                                                                                       | Mechanism of action                                                                                                         | Indication                                                                                                      | Molecular Weight (kDa) | Expression System                | Post-translational modification                                                                                                | Pharmacokinetic parameters                                                                                                                                                                                                                                                                                                                                                                                                                                           |
|------------------|------------------------------------------------------------------------------------------------------------------------------------------------------|-----------------------------------------------------------------------------------------------------------------------------|-----------------------------------------------------------------------------------------------------------------|------------------------|----------------------------------|--------------------------------------------------------------------------------------------------------------------------------|----------------------------------------------------------------------------------------------------------------------------------------------------------------------------------------------------------------------------------------------------------------------------------------------------------------------------------------------------------------------------------------------------------------------------------------------------------------------|
|                  |                                                                                                                                                      |                                                                                                                             |                                                                                                                 |                        |                                  | and O-linked glycosylation, $\beta$ -hydroxylation (Peters et al., 2010)                                                       | <ul style="list-style-type: none"> <li>Mean (range) Vd at steady state* = 227 (162–296) mL/kg (Shapiro et al., 2012)</li> </ul>                                                                                                                                                                                                                                                                                                                                      |
| <b>Atacicept</b> | Homodimeric fusion protein, which comprises the extracellular domain of TACI, the 3' end of which is fused to the 5' end of human IgG1 (Gatto, 2008) | Soluble decoy receptor that binds BLYS and APRIL and prevents their interaction with membrane-bound receptors (Gatto, 2008) | In phase 2/3 development for SLE [clinicaltrials.gov: NCT00624338]                                              | 73.4 (Gatto, 2008)     | CHO cells (Gatto, 2008)          | One putative N-glycosylation site; most abundant glycans identified were agalactobiantennary fucosylated glycans (Gatto, 2008) | <ul style="list-style-type: none"> <li>Mode of administration = IV injection (Pena-Rossi et al., 2009)</li> <li>Median (range) <math>t_{1/2}</math>* = 27-32 (20-44) days (Pena-Rossi et al., 2009)</li> <li>Median (range) CL* = 0.282-0.319 (0.201-0.315) L/h (Pena-Rossi et al., 2009)</li> </ul>                                                                                                                                                                 |
| <b>APG101</b>    | Fully human fusion protein comprising the extracellular domain of the CD95 receptor and IgG Fc domain (Apogenix, 2012b)                              | Binds to CD95 ligand inhibiting binding to its receptor (Apogenix, 2012b)                                                   | In phase 2 development for glioblastoma and phase 1 development for myelodysplastic syndromes (Apogenix, 2012a) | N/A                    | N/A                              | N/A                                                                                                                            | <ul style="list-style-type: none"> <li>Mode of administration = IV injection (Tuettenberg et al., 2012)</li> <li>For dose of 0.2 to 20 mg/ml, mean (SD): <ul style="list-style-type: none"> <li><math>t_{1/2}</math>* = 3 (1) to 14 (0.5) days (Tuettenberg et al., 2012)</li> <li>CL* = 0.88 (0.25) to 0.44 (0.014) ml/h•kg (Tuettenberg et al., 2012)</li> <li>Vd at steady state* = 89 (2.6) to 170 (5.5) ml/kg (Tuettenberg et al., 2012)</li> </ul> </li> </ul> |
| <b>AMG 386</b>   | Peptibody in which angiopoietin-2 peptides are fused to Fc domain of human IgG1 (Neal and Wakelee, 2010)                                             | Binds to angiopoietin-1 and angiopoietin-2 and blocks Tie-2 receptor signaling (Neal and Wakelee, 2010)                     | In phase 2 development for multiple cancers, and phase 3 development for ovarian cancer                         | N/A                    | E. coli (Neal and Wakelee, 2010) | N/A                                                                                                                            | <ul style="list-style-type: none"> <li>Mode of administration = IV injection (Herbst et al., 2009)</li> <li>For doses of 0.3 mg/kg: <ul style="list-style-type: none"> <li>Mean <math>t_{1/2}</math> ranged from 3.1 to 5.1 days (Herbst et al., 2009)</li> </ul> </li> </ul>                                                                                                                                                                                        |

| Drug               | Fusion protein                                                                                                                  | Mechanism of action                                                                                                                                  | Indication                                            | Molecular Weight (kDa)      | Expression System                    | Post-translational modification       | Pharmacokinetic parameters                                                                                                                                                                                                                                                                                                                                                                                               |
|--------------------|---------------------------------------------------------------------------------------------------------------------------------|------------------------------------------------------------------------------------------------------------------------------------------------------|-------------------------------------------------------|-----------------------------|--------------------------------------|---------------------------------------|--------------------------------------------------------------------------------------------------------------------------------------------------------------------------------------------------------------------------------------------------------------------------------------------------------------------------------------------------------------------------------------------------------------------------|
|                    |                                                                                                                                 |                                                                                                                                                      |                                                       |                             |                                      |                                       | <ul style="list-style-type: none"> <li>○ Mean CL ranged from 0.7 to 1.27 mL/kg/hour (Herbst et al., 2009)</li> <li>○ Mean Vd at steady state ranged from 79.8 to 110 mL/kg (Herbst et al., 2009)</li> </ul>                                                                                                                                                                                                              |
| <b>Sotatercept</b> | Chimeric fusion protein comprising the 2 extracellular components of ACVR2A and Fc domain of human IgG1 (Raje and Vallet, 2010) | Sequesters activin and inhibits downstream signaling (Raje and Vallet, 2010), which increases hemoglobin and red blood cell levels (Acceleron, 2012) | In phase 2/3 development for anemia (Acceleron, 2012) | 106 (Raje and Vallet, 2010) | HEK293 cells (Raje and Vallet, 2010) | Glycosylation (Raje and Vallet, 2010) | <ul style="list-style-type: none"> <li>● Mode of administration = IV and SC injection (Ruckle et al., 2009)</li> <li>● Over IV dose range of 0.1–3.0 mg/kg: <ul style="list-style-type: none"> <li>○ Mean CL* = 0.092-0.128 ml/h/kg (Ruckle et al., 2009)</li> <li>○ Mean Vd* = 73.7 - 110 ml/kg (Ruckle et al., 2009)</li> <li>○ Mean t<sub>1/2</sub>* = 23.7 to 31.8 days (Ruckle et al., 2009)</li> </ul> </li> </ul> |

\*Single-dose PK evaluation; \*\*Multiple-dose PK evaluation; \*\*\*Based on PK modeling; \*\*\*\*Published phase 1 and/or beyond; TNF = tumor necrosis factor; CHO = Chinese hamster ovary; SC = subcutaneous; t<sub>1/2</sub> = half-life; SD = standard deviation; CL = clearance; Vd = volume of distribution; LFA = lymphocyte function-associated antigen; IM = intramuscular; ELISA = enzyme-linked immunosorbent assay; IL = interleukin; IL-1RacP = interleukin-1 receptor accessory protein; IL-1ra = IL-1 receptor antagonist; CTLA = cytotoxic T-lymphocyte antigen; IV = intravenous; APC = antigen presenting cell; IFN = interferon; VEGFR = vascular endothelial growth factor receptor; VEGF = vascular endothelial growth factor; PlGF = placental growth factor; rFVIII = recombinant factor VIII; rFIX = recombinant factor IX; TACI = transmembrane activator and calcium-modulator and cyclophilin ligand interactor; BLYS = B lymphocyte stimulator; APRIL = proliferation inducing ligand; SLE = systemic lupus erythematosus; ACVR2A = activin receptor 2A

## References

Acceleron. (2012). Products. Available from: <http://www.acceleronpharma.com/products/sotatercept/> [last accessed 20 Jul 2012].

Apogenix. (2012a). Pipeline. Available from: <http://apogenix.com/pipeline/overview/> [last accessed 19 Jul 2012].

Apogenix. (2012b). Product/mode of action. Available from: <http://apogenix.com/pipeline/apg101/product-mode-of-action/> [last accessed 19 Jul 2012].

Arcalyst. (2010). Prescribing information. Available from: [http://www.regeneron.com//ArcalystPI-US-Summary-EMEA/Arcalyst\\_PI\\_June\\_2010r3-1.pdf](http://www.regeneron.com//ArcalystPI-US-Summary-EMEA/Arcalyst_PI_June_2010r3-1.pdf) [last accessed 24 Apr 2012].

Amevive. (2011). Prescribing information. Available from: <http://www.astellas.us/docs/amevive.pdf> [last accessed 24 Apr 2012].

Biogen Idec. (2012). R&D pipeline. Available from: <http://www.biogenidechemophilia.com/our-research/pipeline/> [last accessed 19 Jul 2012].

Ciombor KK, Berlin J, Chan E. (2013). Aflibercept. *Clin Cancer Res*, 19, 1920–5.

Dumont JA, Liu T, Low SC, et al. (2012). Prolonged activity of a recombinant factor VIII-Fc fusion protein in hemophilia A mice and dogs. *Blood*, 119, 3024–30.

Enbrel. (2011). Prescribing Information. Available from: [http://pi.amgen.com/united\\_states/enbrel/derm/enbrel\\_pi.pdf](http://pi.amgen.com/united_states/enbrel/derm/enbrel_pi.pdf) [last accessed 24 Apr 2012].

Eylea. (2011). Prescribing information. Available from: <http://www.regeneron.com/Eylea/eylea-fpi.pdf> [last accessed 24 Apr 2012].

Gatto B. (2008). Atacicept, a homodimeric fusion protein for the potential treatment of diseases triggered by plasma cells. *Curr Opin Investig Drugs*, 9, 1216–27.

Gillespie J, Mathews R, Mcdermott MF. (2010). Riloncept in the management of cryopyrin-associated periodic syndromes (CAPS). *J Inflamm Res*, 3, 1–8.

Goldenberg MM. (1999). Etanercept, a novel drug for the treatment of patients with severe, active rheumatoid arthritis. *Clin Ther*, 21, 75–87; discussion 1–2.

Herbst RS, Hong D, Chap L, et al. (2009). Safety, pharmacokinetics, and antitumor activity of AMG 386, a selective angiopoietin inhibitor, in adult patients with advanced solid tumors. *J Clin Oncol*, 27, 3557–65.

Holash J, Davis S, Papadopoulos N, et al. (2002). VEGF-Trap: a VEGF blocker with potent antitumor effects. *Proc Natl Acad Sci U S A*, 99, 11393–8.

Larsen CP, Pearson TC, Adams AB, et al. (2005). Rational development of LEA29Y (belatacept), a high-affinity variant of CTLA4-Ig with potent immunosuppressive properties. *Am J Transplant*, 5, 443–53.

Mahlangu J, Powell J, Ragni M, et al. (2013). Phase 3 clinical study of recombinant Fc fusion factor VIII (rFVIII-Fc) demonstrated safety, efficacy and improved pharmacokinetics (A-LONG). *Haemophilia*, 19, 70.

Majeau GR, Meier W, Jimmo B, et al. (1994). Mechanism of lymphocyte function-associated molecule 3-Ig fusion proteins inhibition of T cell responses. Structure/function analysis in vitro and in human CD2 transgenic mice. *J Immunol*, 152, 2753–67.

Miller GT, Hochman PS, Meier W, et al. (1993). Specific interaction of lymphocyte function-associated antigen 3 with CD2 can inhibit T cell responses. *J Exp Med*, 178, 211–22.

Mohler KM, Torrance DS, Smith CA, et al. (1993). Soluble tumor necrosis factor (TNF) receptors are effective therapeutic agents in lethal endotoxemia and function simultaneously as both TNF carriers and TNF antagonists. *J Immunol*, 151, 1548–61.

Molineux G, Newland A. (2010). Development of romiplostim for the treatment of patients with chronic immune thrombocytopenia: from bench to bedside. *Br J Haematol*, 150, 9–20.

Neal J, Wakelee H. (2010). AMG-386, a selective angiopoietin-1/-2-neutralizing peptibody for the potential treatment of cancer. *Curr Opin Mol Ther*, 12, 487–95.

Nplate. (2011). Prescribing information. Available from: [http://pi.amgen.com/united\\_states/nplate/nplate\\_pi\\_hcp\\_english.pdf](http://pi.amgen.com/united_states/nplate/nplate_pi_hcp_english.pdf) [last accessed 24 Apr 2012].

Nulojix. (2011). Prescribing Information. Available from: [http://packageinserts.bms.com/pi/pi\\_nulojix.pdf](http://packageinserts.bms.com/pi/pi_nulojix.pdf) [last accessed 24 Apr 2012].

Orencia. (2011). Prescribing Information. Available from: [http://packageinserts.bms.com/pi/pi\\_orencia.pdf](http://packageinserts.bms.com/pi/pi_orencia.pdf) [last accessed 24 Apr 2012].

Papadopoulos N, Martin J, Ruan Q, et al. (2012). Binding and neutralization of vascular endothelial growth factor (VEGF) and related ligands by VEGF Trap, ranibizumab and bevacizumab. *Angiogenesis*, 15, 171–85.

Pena-Rossi C, Nasonov E, Stanislav M, et al. (2009). An exploratory dose-escalating study investigating the safety, tolerability, pharmacokinetics and pharmacodynamics of intravenous atacicept in patients with systemic lupus erythematosus. *Lupus*, 18, 547–55.

Peters RT, Low SC, Kamphaus GD, et al. (2010). Prolonged activity of factor IX as a monomeric Fc fusion protein. *Blood*, 115, 2057–64.

Peters RT, Toby G, Lu Q, et al. (2013). Biochemical and functional characterization of a recombinant monomeric factor VIII-Fc fusion protein. *J Thromb Haemost*, 11, 132–41.

Powell JS, Josephson NC, Quon D, et al. (2012). Safety and prolonged activity of recombinant factor VIII Fc fusion protein in hemophilia A patients. *Blood*, 119, 3031–7.

Raje N, Vallet S. (2010). Sotatercept, a soluble activin receptor type 2A IgG-Fc fusion protein for the treatment of anemia and bone loss. *Curr Opin Mol Ther*, 12, 586–97.

Rilonacept\_Smpc. (2009). Summary of product characteristics. Available from: [http://www.regeneron.com/ArcalystPI-US-Summary-EMEA/emea-combined-\\_rilonaceptSmPCFeb2012.pdf](http://www.regeneron.com/ArcalystPI-US-Summary-EMEA/emea-combined-_rilonaceptSmPCFeb2012.pdf) [last accessed 18 Apr 2012].

Ruckle J, Jacobs M, Kramer W, et al. (2009). Single-dose, randomized, double-blind, placebo-controlled study of ACE-011 (ActRIIA-IgG1) in postmenopausal women. *J Bone Miner Res*, 24, 744–52.

Shapiro AD, Ragni MV, Valentino LA, et al. (2012). Recombinant factor IX-Fc fusion protein (rFIXFc) demonstrates safety and prolonged activity in a phase 1/2a study in hemophilia B patients. *Blood*, 119, 666–72.

Tuettenberg J, Seiz M, Debatin KM, et al. (2012). Pharmacokinetics, pharmacodynamics, safety and tolerability of APG101, a CD95-Fc fusion protein, in healthy volunteers and two glioma patients. *Int Immunopharmacol*, 13, 93–100.

Walsh G. (2010). Post-translational modifications of protein biopharmaceuticals. *Drug Discov Today*, 15, 773–80.

Wang B, Nichol JL, Sullivan JT. (2004). Pharmacodynamics and pharmacokinetics of AMG 531, a novel thrombopoietin receptor ligand. *Clin Pharmacol Ther*, 76, 628–38.

Zhou H. (2005). Clinical pharmacokinetics of etanercept: a fully humanized soluble recombinant tumor necrosis factor receptor fusion protein. *J Clin Pharmacol*, 45, 490–7.



Supplementary Table 2: Mutations in the Fc fragment with enhanced FcRn affinity (modified according to (Presta, 2008)).

| <b>IgG variant</b>                                                     | <b>Alteration (Fc Domain)</b>             | <b>Engineered Antibody</b>          | <b>FcRn binding pH 6.0 -fold increase-</b>      | <b>Serum t<sub>1/2</sub> -fold increase-</b> | <b>Ref</b>                                   |
|------------------------------------------------------------------------|-------------------------------------------|-------------------------------------|-------------------------------------------------|----------------------------------------------|----------------------------------------------|
| <b><i>Fc Mutations with increased in vivo half-life</i></b>            |                                           |                                     |                                                 |                                              |                                              |
| <b>QL</b>                                                              | T250Q (CH2)<br>M428L (CH3)                | anti-HBV OST577 IgG1                | 37x (rhesus)<br>29x (human)                     | 2.5x (rhesus)                                | (Hinton et al., 2004, Hinton et al., 2006)   |
|                                                                        |                                           | anti-HBV OST577 IgG1                | 28x (human)<br>27x (rhesus)                     | 1.9x (rhesus)                                | (Hinton et al., 2004)                        |
|                                                                        |                                           | anti-TNF $\alpha$ IgG1              | 40x (cynomolgus)<br>500x (mouse)                | unchanged (cynomolgus)                       | (Datta-Mannan et al., 2007b)                 |
| <b>LS</b>                                                              | M428L (CH3)<br>N434S (CH3)                | anti-VEGF IgG1 (bevacizumab)        | 11x (human)                                     | 3.2x (cynomolgus)<br>4x (hFcRn Tg mice)      | (Zalevsky et al., 2010)                      |
|                                                                        |                                           | anti-VEGF IgG1 (cetuximab)          |                                                 | 3.1x (cynomolgus)<br>5x (hFcRn-Tg mice)      |                                              |
| <b>A</b>                                                               | N434A (CH3)                               | anti-HER2 IgG1 (Hu4D5)              | 3.4x (human)                                    | 2.2x (hFcRn Tg mice)                         | (Petkova et al., 2006, Shields et al., 2001) |
| <b>AAA</b>                                                             | T307A (CH2)<br>E380A (CH3)<br>N434A (CH3) | Anti-HER2 IgG1 (Hu4D5)              | 11.8x (human)                                   | 2.5x (hFcRn Tg mice)                         | (Petkova et al., 2006, Shields et al., 2001) |
| <b>YTE</b>                                                             | M252Y (CH2)<br>S254T (CH2)<br>T256E (CH2) | Anti-RSV IgG1 (MEDI-524)            | 10x (cynomolgus)<br>10x (human)                 | 4x (cynomolgus)                              | (Dall'Acqua et al., 2006)                    |
| <b>NA</b>                                                              | N434A (CH3)                               | Anti-HER2-IgG1 (Hu4D5, trastuzumab) | 4x (cynomolgus)                                 | 1.6–2.3x (cynomolgus)                        | (Yeung et al., 2009)                         |
| <b><i>Fc mutations with unaltered or reduced in vivo half-life</i></b> |                                           |                                     |                                                 |                                              |                                              |
| <b>NW</b>                                                              | N434W (CH3)                               | anti-HER2 IgG (Hu4D5, trastuzumab)  | 80x (cynomolgus)                                | unchanged (cynomolgus)                       | (Yeung et al., 2009)                         |
| <b>VH</b>                                                              | D376V<br>N434H                            | anti-TNF IgG1                       | 15x (human)<br>52x (cynomolgus)<br>17x (mouse)  | 0.8x (cynomolgus)<br>0.1x (mouse)            | (Datta-Mannan et al., 2007a)                 |
| <b>IH</b>                                                              | P257I<br>N434H                            | anti-TNF IgG1                       | 16x (human)<br>52x (cynomolgus)<br>197x (mouse) | 0.7x (cynomolgus)<br>0.03x (mouse)           | (Datta-Mannan et al., 2007a)                 |

|    |                |               |                                                |                                           |                                 |
|----|----------------|---------------|------------------------------------------------|-------------------------------------------|---------------------------------|
| II | P257I<br>Q311I | anti-TNF IgG1 | 19x (human)<br>80x (cynomolgus)<br>25x (mouse) | unchanged<br>(cynomolgus)<br>0.1x (mouse) | (Datta-Mannan et al.,<br>2007b) |
|----|----------------|---------------|------------------------------------------------|-------------------------------------------|---------------------------------|

## References

Dall'acqua WF, Woods RM, Ward ES, et al. (2002). Increasing the affinity of a human IgG1 for the neonatal Fc receptor: biological consequences. *J Immunol*, 169, 5171–80.

Datta-Mannan A, Witcher DR, Tang Y, et al. (2007a). Humanized IgG1 variants with differential binding properties to the neonatal Fc receptor: relationship to pharmacokinetics in mice and primates. *Drug Metab Dispos*, 35, 86–94.

Datta-Mannan A, Witcher DR, Tang Y, et al. (2007b). Monoclonal antibody clearance. Impact of modulating the interaction of IgG with the neonatal Fc receptor. *J Biol Chem*, 282, 1709–17.

Hinton PR, Johlfis MG, Xiong JM, et al. (2004). Engineered human IgG antibodies with longer serum half-lives in primates. *J Biol Chem*, 279, 6213–6.

Hinton PR, Xiong JM, Johlfis MG, et al. (2006). An engineered human IgG1 antibody with longer serum half-life. *J Immunol*, 176, 346–56.

Petkova SB, Akilesh S, Sproule TJ, et al. (2006). Enhanced half-life of genetically engineered human IgG1 antibodies in a humanized FcRn mouse model: potential application in humorally mediated autoimmune disease. *Int Immunol*, 18, 1759–69.

Presta LG. (2008). Molecular engineering and design of therapeutic antibodies. *Curr Opin Immunol*, 20, 460–70.

Shields RL, Namenuk AK, Hong K, et al. (2001). High resolution mapping of the binding site on human IgG1 for Fc gamma RI, Fc gamma RII, Fc gamma RIII, and FcRn and design of IgG1 variants with improved binding to the Fc gamma R. *J Biol Chem*, 276, 6591–604.

Yeung YA, Leabman MK, Marvin JS, et al. (2009). Engineering human IgG1 affinity to human neonatal Fc receptor: impact of affinity improvement on pharmacokinetics in primates. *J Immunol*, 182, 7663–71.

Zalevsky J, Chamberlain AK, Horton HM, et al. (2010). Enhanced antibody half-life improves in vivo activity. *Nat Biotechnol*, 28, 157–9.
